# Supplementary material for: The Impact of Consuming Zinc-Biofortified Wheat Flour on Haematological Indices of Zinc and Iron Status in Adolescent Girls in Rural Pakistan: A Cluster-Randomised, Double-Blind, Controlled Effectiveness Trial
Source: MDPI journal article supplement (doi:10.3390/nu14081657), 2022-04-15
Supplement: s1 [file s1]

**Table S2.** Haemoglobin and other haematological measures by study arms at baseline, mid-point and endline.

| Outcomes                                                               | Time Points | n     | Control        | n   | Intervention   | $\beta$ (95%CI)*       | X <sup>2</sup>     | t      | p     |
|------------------------------------------------------------------------|-------------|-------|----------------|-----|----------------|------------------------|--------------------|--------|-------|
| Haemoglobin, Hb (g/dL)                                                 | Baseline    | 219   | 12.9 $\pm$ 1.3 | 200 | 12.8 $\pm$ 1.1 |                        |                    |        |       |
|                                                                        | Midpoint    | 214   | 12.8 $\pm$ 1.6 | 192 | 13.0 $\pm$ 1.5 | 0.232 (-0.054, 0.518)  |                    | 1.640  | 0.109 |
|                                                                        | Edline      | 213   | 12.9 $\pm$ 1.4 | 186 | 12.9 $\pm$ 1.4 | 0.002 (-0.279, 0.283)  |                    | 0.013  | 0.990 |
| Anaemia (Hb <11.5 g/dL for <12 years or <12.0 g/dL for $\geq$ 2 years) | Baseline    | 219   | 39 (17.8)      | 200 | 30 (15.0)      |                        | 0.599              |        | 0.439 |
|                                                                        | Midpoint    | 214   | 36 (16.8)      | 192 | 28 (14.6)      |                        | 0.382 <sup>a</sup> |        | 0.536 |
|                                                                        | Endline     | 213   | 36 (16.9)      | 186 | 35 (18.8)      |                        | 0.249 <sup>a</sup> |        | 0.618 |
| Haematocrit, HCT (%)                                                   | Baseline    | 220   | 37.5 $\pm$ 3.1 | 200 | 37.5 $\pm$ 2.8 |                        |                    |        |       |
|                                                                        | Midpoint    | 210   | 38.1 $\pm$ 3.3 | 191 | 38.6 $\pm$ 3.7 | 0.576 (-0.214, 1.365)  |                    | 1.473  | 0.148 |
|                                                                        | Endline     | 210   | 37.6 $\pm$ 3.3 | 185 | 37.4 $\pm$ 3.4 | -0.200 (-0.949, 0.550) |                    | -0.540 | 0.593 |
| HCT <33.5 %                                                            | Baseline    | 220.0 | 21 (9.5)       | 200 | 12 (6.0)       |                        | 1.819              |        | 0.177 |
|                                                                        | Midpoint    | 210   | 14 (6.7)       | 191 | 13 (6.8)       |                        | 0.003              |        | 0.956 |
|                                                                        | Endline     | 210   | 18 (8.6)       | 185 | 16 (8.6)       |                        | .001               |        | 0.978 |
| Mean corpuscular haemoglobin concentration, MCHC (g/dL)                | Baseline    | 220   | 34.2 $\pm$ 1.3 | 200 | 34.1 $\pm$ 1.3 |                        |                    |        |       |
|                                                                        | Midpoint    | 213   | 33.8 $\pm$ 1.3 | 193 | 33.8 $\pm$ 1.2 | 0.038 (-0.250, 0.326)  |                    | 0.267  | 0.791 |
|                                                                        | Endline     | 212   | 34.4 $\pm$ 1.5 | 188 | 34.7 $\pm$ 1.3 | 0.338 (-0.097, 0.773)  |                    | 1.564  | 0.125 |
| MCHC <32.3 g/dL                                                        | Baseline    | 220.0 | 18 (8.2)       | 200 | 16 (8.0)       |                        | 0.005              |        | 0.946 |
|                                                                        | Midpoint    | 213   | 26 (12.2)      | 193 | 22 (11.4)      |                        | 0.063              |        | 0.801 |
|                                                                        | Endline     | 212   | 20 (9.4)       | 188 | 9 (4.8)        |                        | 3.199              |        | 0.074 |
| Mean corpuscular volume, MCV (fL)                                      | Baseline    | 217   | 82.0 $\pm$ 7.5 | 200 | 82.3 $\pm$ 6.4 |                        |                    |        |       |
|                                                                        | Midpoint    | 213   | 82.9 $\pm$ 7.6 | 191 | 83.1 $\pm$ 6.8 | 0.107 (-0.958, 1.171)  |                    | 0.205  | 0.839 |
|                                                                        | Endline     | 213   | 83.4 $\pm$ 8.1 | 188 | 83.1 $\pm$ 7.0 | -0.883 (-2.283, 0.517) |                    | -1.287 | 0.208 |
| MCV <74.7 fL                                                           | Baseline    | 217   | 23 (10.6)      | 200 | 18 (9.0)       |                        | 0.300              | 0.584  |       |
|                                                                        | Midpoint    | 213   | 22 (10.3)      | 191 | 16 (8.4)       |                        | 0.450              | 0.502  |       |
|                                                                        | Endline     | 213   | 23 (10.8)      | 188 | 15 (8.0)       |                        | 0.925              | 0.336  |       |
| Red blood cell count, RBC count (10 <sup>6</sup> /μL)                  | Baseline    | 220   | 4.6 $\pm$ 0.5  | 200 | 4.6 $\pm$ 0.5  |                        |                    |        |       |
|                                                                        | Midpoint    | 210   | 4.6 $\pm$ 0.5  | 191 | 4.7 $\pm$ 0.5  | 0.073 (-0.023, 0.168)  |                    | 1.541  | 0.133 |
|                                                                        | Endline     | 213   | 4.5 $\pm$ 0.5  | 187 | 4.5 $\pm$ 0.5  | 0.020 (-0.080, 0.120)  |                    | 0.400  | 0.691 |
| RBC count <3.84X10 <sup>6</sup> /μL                                    | Baseline    | 220   | 7 (3.2)        | 200 | 9 (4.5%)       |                        | 0.497              |        | 0.481 |
|                                                                        | Midpoint    | 210   | 8 (3.8)        | 191 | 7 (3.7%)       |                        | 0.006              |        | 0.939 |
|                                                                        | Endline     | 213   | 13 (6.1)       | 187 | 16 (8.6%)      |                        | 0.891              |        | 0.345 |

Data presented as Mean  $\pm$  SD or n (%).

\*Values represent beta coefficient and 95% CI from linear regression models.

p values obtained using linear mixed models adjusted for cluster effect and baseline values to test differences between the groups for continuous variable. Categorical variables by Pearson's chi-square test. Significant was set at p<0.05.
