# Supplementary material for: The Impact of Consuming Zinc-Biofortified Wheat Flour on Haematological Indices of Zinc and Iron Status in Adolescent Girls in Rural Pakistan: A Cluster-Randomised, Double-Blind, Controlled Effectiveness Trial
Source: MDPI journal article supplement (doi:10.3390/nu14081657), 2022-04-15
Supplement: s1 [file s1]

**Table S1.** Spearman correlation coefficient between plasma zinc concentration and inflammatory markers.

|                           |       | Plasma Zinc | C-Reactive Protein | Alpha-1-Acid Glycoprotein |
|---------------------------|-------|-------------|--------------------|---------------------------|
| Plasma Zinc               | $r_s$ | 1.000       | -0.027             | -0.020                    |
|                           | N     | 2177        | 2131               | 2170                      |
| C-Reactive Protein        | $r_s$ | 0.027       | 1.000              | 0.456*                    |
|                           | N     | 2131        | 2154               | 2150                      |
| Alpha-1-Acid Glycoprotein | $r_s$ | -0.020      | 0.456*             | 1.000                     |
|                           | N     | 2170        | 2150               | 2193                      |

\*Correlation significant at the  $p = 0.01$  level.  
 $r_s$ , Spearman's rho correlation coefficient.
