# Supplementary material for: The Impact of Consuming Zinc-Biofortified Wheat Flour on Haematological Indices of Zinc and Iron Status in Adolescent Girls in Rural Pakistan: A Cluster-Randomised, Double-Blind, Controlled Effectiveness Trial
Source: MDPI journal article supplement (doi:10.3390/nu14081657), 2022-04-15
Supplement: s1 [file s1]

**Table S3.** Prevalence of various grades of anaemia by study arms at baseline, midpoint and endline.

| Time Points | Anaemia Grade * | n   | Control    | n   | Intervention | X <sup>2</sup> | P     |
|-------------|-----------------|-----|------------|-----|--------------|----------------|-------|
| Baseline    | Mild            | 219 | 23 (10.5)  | 200 | 20 (10.0)    | 1.637          | 0.651 |
|             | Moderate        |     | 15 (6.8)   |     | 10 (5.0)     |                |       |
|             | Severe          |     | 1 (0.5)    |     | 0 (0.0)      |                |       |
|             | None            |     | 180 (82.2) |     | 170 (85.0)   |                |       |
| Midpoint    | Mild            | 214 | 20 (9.3)   | 192 | 16 (8.3)     | 1.162          | 0.762 |
|             | Moderate        |     | 11 (5.1)   |     | 10 (5.2)     |                |       |
|             | Severe          |     | 5 (2.3)    |     | 2 (1.0)      |                |       |
|             | None            |     | 178 (83.2) |     | 164 (85.4)   |                |       |
| Endline     | Mild            | 213 | 19 (8.9)   | 186 | 21 (11.3)    | 0.691          | 0.875 |
|             | Moderate        |     | 14 (6.6)   |     | 12 (6.5)     |                |       |
|             | Severe          |     | 3 (1.4)    |     | 2 (1.1)      |                |       |
|             | None            |     | 177 (83.1) |     | 151 (81.2)   |                |       |

Data presented as n (%).

\*Mild (Hb=11.0-11.4 g/dL for <12 years or 11.0-11.9 g/dL for ≥12 years); Moderate (Hb=8.0-10.9 g/dL); Severe (Hb <8.0 g/dL); Non-anaemic (Hb ≥11.5 g/dL for <12 years or ≥12.0 g/dL for ≥12 years)

P values obtained by Pearson's chi-square test. Significance was set at p<0.05.
