# Supplementary figures and images for: The Impact of Consuming Zinc-Biofortified Wheat Flour on Haematological Indices of Zinc and Iron Status in Adolescent Girls in Rural Pakistan: A Cluster-Randomised, Double-Blind, Controlled Effectiveness Trial
Source: MDPI journal article supplement (doi:10.3390/nu14081657), 2022-04-15

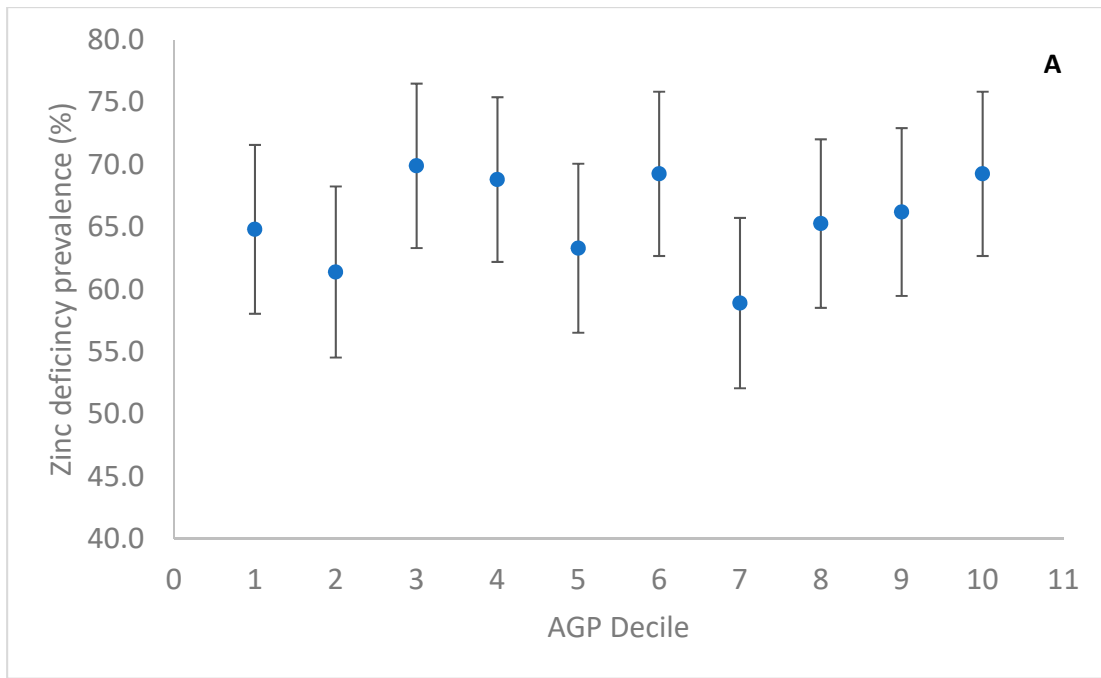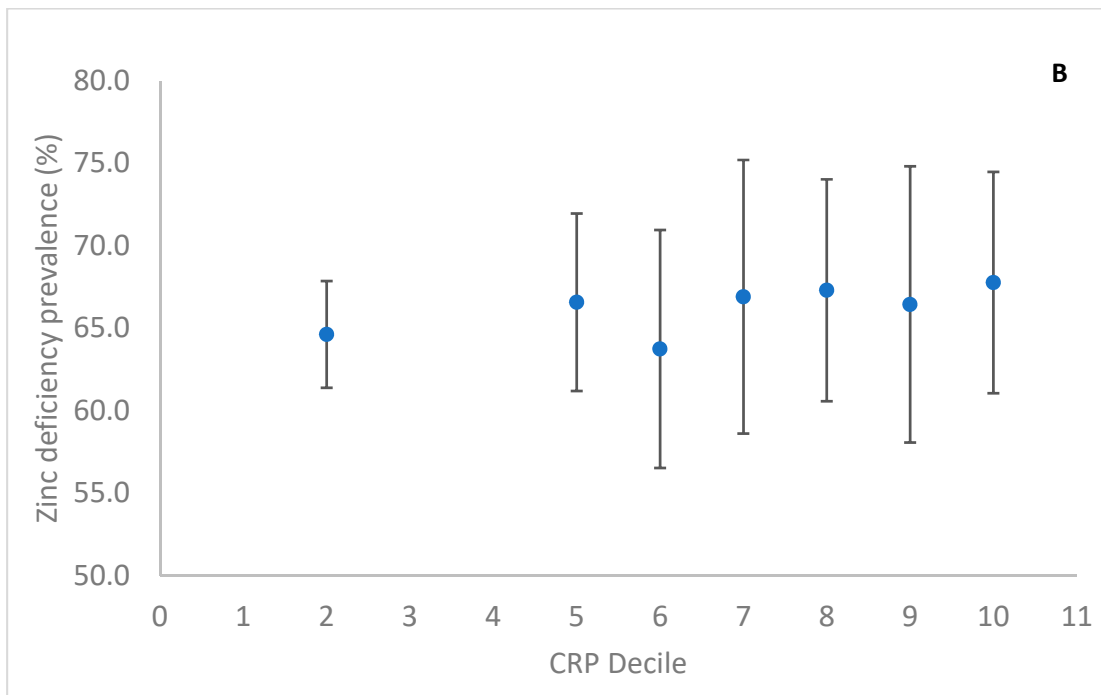

Supplement: s1 [file s1]
